# Supplementary material
Source: Elsevier journal article supplement (https://comptes-rendus.academie-sciences.fr/chimie/article/10.1016/j.crci.2014.10.011/file/attach/mmc1.pdf)
Supplement: mmc1 [file mmc1.pdf]

## Supporting Information

### **Reduction of carbonyl compounds by Raney Ni-Al Alloy, Al powder in the presence of noble metal catalysts in Water**

**Ummey Rayhan,<sup>a,b</sup> Jung Hee Do,<sup>a</sup> Takashi Arimura,<sup>c</sup>  
and Takehiko Yamato<sup>a,\*</sup>**

*<sup>a</sup>Department of Applied Chemistry, Faculty of Science and Engineering, Saga University, Honjo-machi 1 Saga, 840-8502, Japan*

*E-mail: [yamatot@cc.saga-u.ac.jp](mailto:yamatot@cc.saga-u.ac.jp)*

*<sup>b</sup>Department of Chemistry, Dhaka University of Engineering and Technology, Gazipur Gazipur-1700, Bangladesh*

*E-mail: [rayhanchem@yahoo.com](mailto:rayhanchem@yahoo.com)*

*<sup>c</sup>National Institute of Advanced Industrial Science and Technology, AIST Central 5, 1-1 Higashi, Tsukuba, Ibaraki 305-8565, Japan*

*E-mail: [takashi-arimura@aist.go.jp](mailto:takashi-arimura@aist.go.jp)*

## Table of Contents

|                                         |     |
|-----------------------------------------|-----|
| 1. Experimental section.....            | S2  |
| 2. Table S1.....                        | S3  |
| 3. Table S2.....                        | S4  |
| 4. Table S3.....                        | S4  |
| 5. Table S4.....                        | S4  |
| 6. Table S5.....                        | S5  |
| 7. Fig S6.....                          | S5  |
| 8. Fig S7: GC of Table 2 Entry 1.....   | S6  |
| 9. Fig S8: GC of Table 2 Entry 2.....   | S7  |
| 10. Fig S9: GC of Table 2 Entry 3.....  | S7  |
| 11. Fig S10: GC of Table 2 Entry 4..... | S8  |
| 12. Fig S11: GC of Table 2 Entry 5..... | S8  |
| 13. Fig S12: GC of Table 7 Entry 1..... | S9  |
| 14. Fig S13: GC of Table 7 Entry 2..... | S9  |
| 15. Fig S14: GC of Table 7 Entry 3..... | S10 |
| 16. Fig S15: GC of Table 7 Entry 4..... | S10 |
| 17. Fig S16: GC of Table 7 Entry 5..... | S11 |
| 18. Fig S17: GC of Table 9 Entry 1..... | S11 |

### **1 Experimental section**

#### **1.1 General Remarks**

All melting points are uncorrected.  $^1\text{H}$  NMR spectra were recorded at 300 MHz on a Nippon Denshi JEOL FT-300 NMR spectrometer in  $\text{CDCl}_3$  with  $\text{Me}_4\text{Si}$  as an internal reference. IR spectra were measured as KBr pellets on a Nippon Denshi JIR-AQ20M spectrometer. Mass spectra were obtained on Shimadzu GC-MS-QP5050A Ultrahigh Performance Mass Spectrometer AOC-20I, 100V using a direct-inlet system. GLC analyses were performed with a Shimadzu gas chromatograph, GC-2010.

#### **1.2 Reagent list**

Raney Ni–Al alloy (50:50, wt %) (Wako), Al powder (500 wt%) (53–150  $\mu\text{m}$ , 99.5%) (Wako), Pt/C, Pd/C, Ru/C and Rh/C (5 wt%) (Wako), Distilled water (Wako)

### 1.3 Typical procedure

To the mixture of substrate (20 mg, 0.11mmol) (Wako), Raney Ni–Al alloy (50:50, wt %), Al powder (500 wt %) (53–150  $\mu\text{m}$ , 99.5%) (Wako) and Pt/C, Pd/C, Ru/C and Rh/C (20 mg) (4.5 mole % metal) (Wako) was added  $\text{H}_2\text{O}$  (0.5 mL) (Wako distilled water). After heating at 60–80  $^\circ\text{C}$  for 3–18 h, the mixture was cooled to room temperature. The solution was diluted with 1 mL of water and then stirred overnight at room temperature in a sealed tube. After 24 h, the solution was extracted with diethyl ether (2 mL  $\times$  3) following the reported procedures [32]. The organic layer was combined, dried with  $\text{MgSO}_4$ , filtered through a cotton layer and concentrated in vacuum to give the corresponding hydrogenated product. The yields were determined by GLC analysis by using the standard compound (1,2,3,4-tetrahydronaphthalene) and products were identified by GC-MS.

#### Reduction of benzophenone (1a)

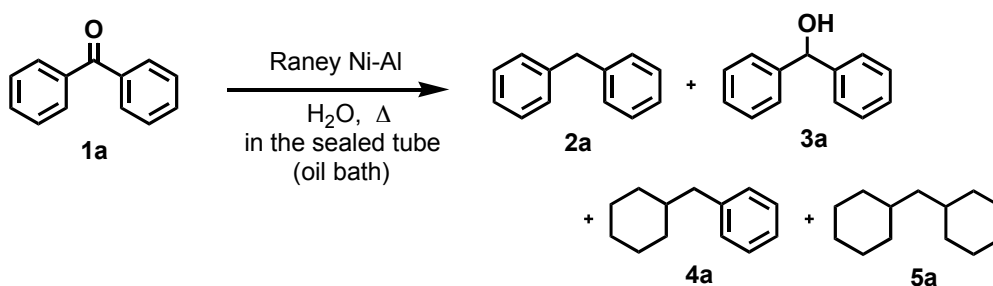

**Table S1** Effects of the reaction temperature for hydrogenation of benzophenone (1a) by using Raney Ni–Al alloy in water<sup>a,b</sup>

| Entry | Temp. ( $^\circ\text{C}$ ) | 2a     | 3a | Yield(%) <sup>d,e</sup><br>4a | 5a | recovery<br>1a |
|-------|----------------------------|--------|----|-------------------------------|----|----------------|
| 1     | r.t                        | 0      | 0  | 0                             | 0  | 100            |
| 2     | r.t <sup>c</sup>           | 91     | 0  | 8                             | 0  | 1              |
| 3     | 40                         | 15     | 38 | 1                             | 1  | 46             |
| 4     | 60                         | 93[86] | 0  | 7                             | 0  | 0              |
| 5     | 80                         | 77     | 0  | 18                            | 3  | 2              |
| 6     | 100                        | 49     | 0  | 46                            | 4  | 0              |

<sup>a</sup>Substrate: 20 mg, Ni–Al alloy: 100 mg (500 wt%),  $\text{H}_2\text{O}$ : 0.5 mL, <sup>b</sup>Conditions: time: 3 h, <sup>c</sup>time: 24 h, <sup>d</sup>The yields were determined by GLC, <sup>e</sup>The Isolated yields are shown in square bracket.

**Table S2** Effects of time for hydrogenation of benzophenone (**1a**) by using Raney Ni–Al alloy in water<sup>a,b</sup>

| Entry | Time (h) | <b>2a</b> | <b>3a</b> | Yield(%) <sup>c,d</sup><br><b>4a</b> | <b>5a</b> | recovery<br><b>1a</b> |
|-------|----------|-----------|-----------|--------------------------------------|-----------|-----------------------|
| 1     | 0.25     | 2         | 0         | 0                                    | 0         | 98                    |
| 2     | 0.5      | 8         | 16        | 0                                    | 0         | 76                    |
| 3     | 1        | 14        | 0         | 2                                    | 0         | 84                    |
| 4     | 2        | 76        | 6         | 5                                    | 0         | 12                    |
| 5     | 2.5      | 78        | 3         | 7                                    | 0         | 12                    |
| 6     | 3        | 93[86]    | 0         | 7                                    | 0         | 0                     |
| 7     | 4        | 90        | 2         | 7                                    | 0         | 0                     |
| 8     | 8        | 88        | 1         | 10                                   | 0         | 0                     |

<sup>a</sup> Substrate: 20 mg, Ni–Al alloy: 100 mg (500wt%), H<sub>2</sub>O: 0.5 mL, <sup>b</sup> Condition: temp: 60 °C, <sup>c</sup> The yields were determined by GLC, <sup>d</sup> The Isolated yields are shown in square bracket.

**Table S3** Effects of catalysis for hydrogenation of benzophenone (**1a**) in water<sup>a,b</sup>

| Entry | Raney Ni–Al (wt%) | <b>2a</b> | <b>3a</b> | Yield(%) <sup>c,d</sup><br><b>4a</b> | <b>5a</b> | recovery<br><b>1a</b> |
|-------|-------------------|-----------|-----------|--------------------------------------|-----------|-----------------------|
| 1     | 50                | 0         | 0         | 0                                    | 0         | 100                   |
| 2     | 100               | 0         | 0         | 0                                    | 0         | 100                   |
| 3     | 200               | 2         | 0         | 0                                    | 0         | 98                    |
| 4     | 300               | 79        | 13        | 3                                    | 0         | 5                     |
| 5     | 400               | 85        | 0         | 7                                    | 0         | 6                     |
| 6     | 500               | 93[86]    | 0         | 7                                    | 0         | 0                     |

<sup>a</sup> Substrate: 20 mg, H<sub>2</sub>O: 0.5 mL, <sup>b</sup> Conditions: time: 3 h, temp: 60 °C, <sup>c</sup> The yields were determined by GLC, <sup>d</sup> The Isolated yields are shown in square bracket.

**Table S4** Effects of amount of water for hydrogenation of benzophenone (**1a**) by using Raney Ni–Al alloy<sup>a,b</sup>

| Entry | H <sub>2</sub> O (mL) | <b>2a</b> | <b>3a</b> | Yield(%) <sup>c,d</sup><br><b>4a</b> | <b>5a</b> | recovery<br><b>1a</b> |
|-------|-----------------------|-----------|-----------|--------------------------------------|-----------|-----------------------|
| 1     | 0.25                  | 84        | 5         | 9                                    | 0         | 2                     |
| 2     | 0.50                  | 93[86]    | 0         | 7                                    | 0         | 0                     |
| 3     | 0.75                  | 87        | 0         | 12                                   | 1         | 0                     |
| 4     | 1.0                   | 82        | 1         | 10                                   | 1         | 6                     |
| 5     | 1.5                   | 73        | 1         | 9                                    | 1         | 16                    |
| 6     | 2.0                   | 73        | 1         | 11                                   | 2         | 13                    |

<sup>a</sup> Substrate: 20 mg, Ni–Al alloy: 100 mg (500wt%), <sup>b</sup> Conditions: time: 3 h, temp: 60 °C, <sup>c</sup> The yields were determined by GLC, <sup>d</sup> The Isolated yields are shown in square bracket.

### Reduction of diphenylmethanol (3a)

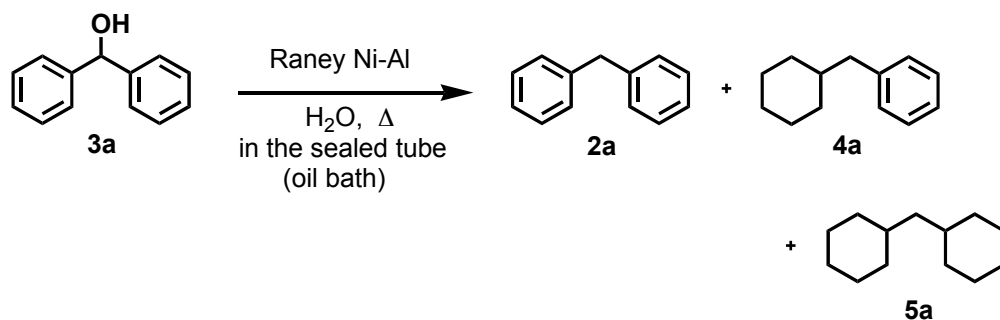

**Table S5** Reduction of diphenylmethanol (3a) by using Raney Ni–Al alloy in water<sup>a,b</sup>

| Entry | Time (h) | Yield(%) <sup>c,d</sup> |    |    | recovery 3a |
|-------|----------|-------------------------|----|----|-------------|
|       |          | 2a                      | 4a | 5a |             |
| 1     | 0.25     | 0                       | 0  | 0  | 100         |
| 2     | 0.50     | 10                      | 0  | 0  | 89          |
| 3     | 0.75     | 24                      | 1  | 0  | 75          |
| 4     | 1        | 27                      | 1  | 0  | 72          |
| 5     | 1.5      | 62                      | 3  | 0  | 36          |
| 6     | 2        | 83                      | 4  | 0  | 13          |
| 7     | 2.5      | 94                      | 6  | 0  | 0           |
| 8     | 3        | 93[86]                  | 7  | 0  | 0           |
| 9     | 12       | 84                      | 16 | 0  | 0           |
| 10    | 24       | 75                      | 25 | 0  | 0           |

<sup>a</sup> Substrate: 20 mg, Ni–Al alloy: 100 mg (500 wt%), H<sub>2</sub>O: 0.5 mL, <sup>b</sup> Condition: temp: 60 °C, <sup>c</sup> The yields were determined by GLC, <sup>d</sup> The Isolated yields are shown in square bracket.

### Kinetic study of reduction of benzophenone:

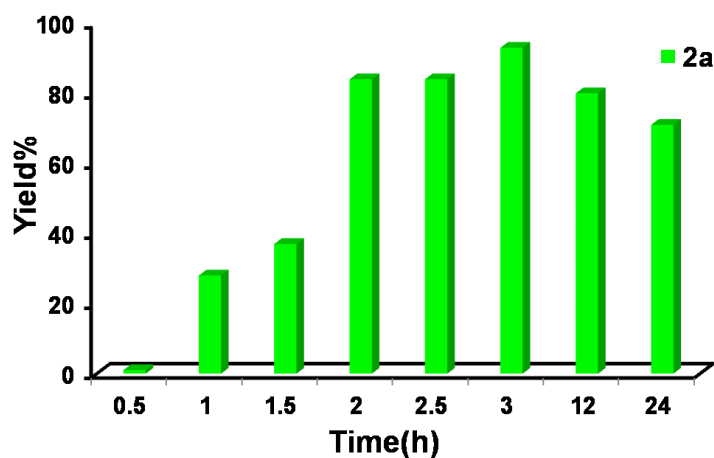

**Fig S6:** Reduction of benzophenone by using Raney Ni–Al alloy in water; Time effect.

**GC Condition:**

|   | Rate (°C/min) | Temperature (°C) | Hold (min) |
|---|---------------|------------------|------------|
| 1 | -             | 100              | -          |
| 2 | 2             | 200              | 5          |

and

|   | Rate (°C/min) | Temperature (°C) | Hold (min) |
|---|---------------|------------------|------------|
| 1 | -             | 100              | -          |
| 2 | 4             | 280              | 5          |

**GC of Table 2 Entry 1**

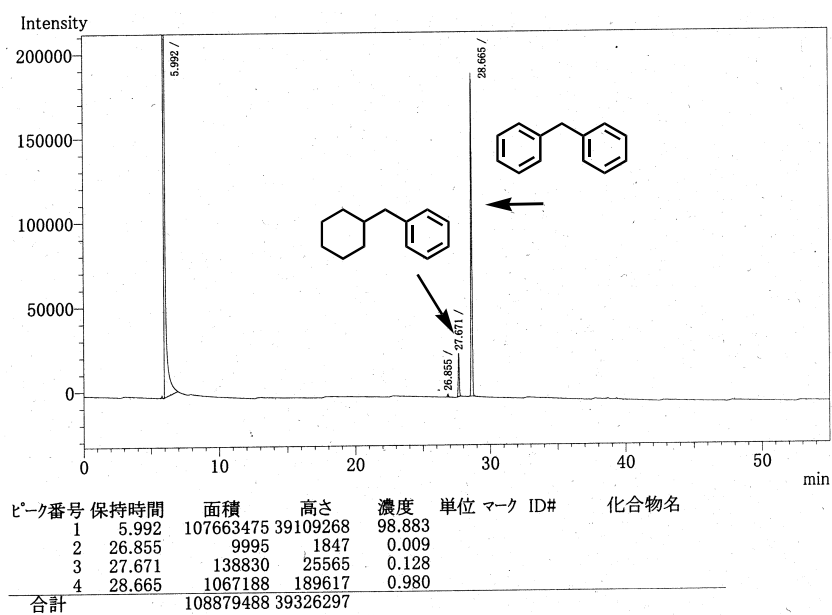

**Fig S7:** Reduction of Benzophenone using Ni–Al alloy and H<sub>2</sub>O at 60 °C for 3 h

### GC of Table 2 Entry 2

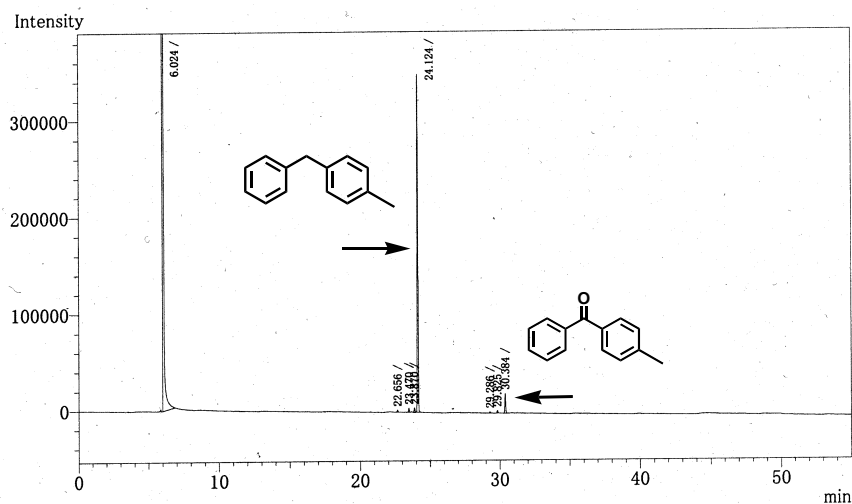

| ピーク番号 | 保持時間   | 面積        | 高さ       | 濃度     | 単位 | マーク | ID# | 化合物名 |
|-------|--------|-----------|----------|--------|----|-----|-----|------|
| 1     | 6.024  | 109540127 | 39435692 | 98.611 |    |     |     |      |
| 2     | 22.656 | 8765      | 2251     | 0.008  |    |     |     |      |
| 3     | 23.470 | 16683     | 4245     | 0.015  |    |     |     |      |
| 4     | 23.870 | 18745     | 4690     | 0.017  |    |     |     |      |
| 5     | 24.124 | 1396341   | 348337   | 1.257  |    |     |     |      |
| 6     | 29.286 | 4848      | 1222     | 0.004  |    |     |     |      |
| 7     | 29.825 | 11383     | 2752     | 0.010  |    |     |     |      |
| 8     | 30.384 | 86065     | 20560    | 0.077  |    |     |     |      |
| 合計    |        | 111082957 | 39819749 |        |    |     |     |      |

**Fig S8:** Reduction of 4-Methylbenzophenone using Ni–Al alloy and H<sub>2</sub>O at 60 °C for 3 h

### GC of Table 2 Entry 3

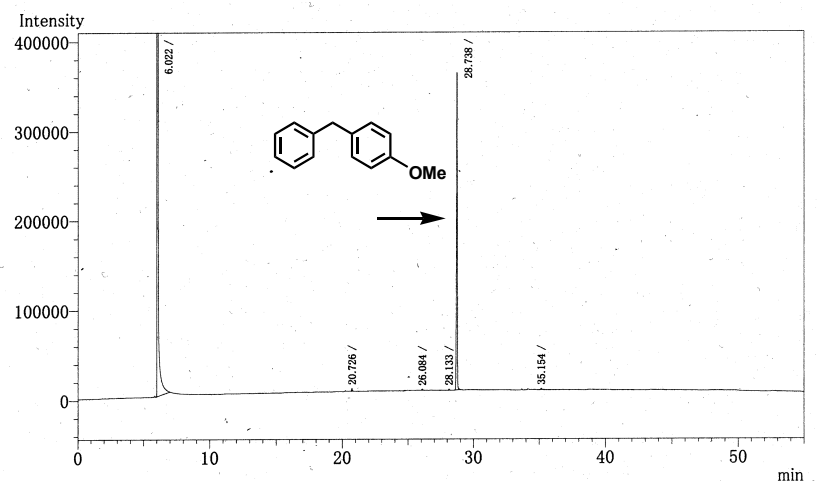

| ピーク番号 | 保持時間   | 面積        | 高さ       | 濃度     | 単位 | マーク | ID# | 化合物名 |
|-------|--------|-----------|----------|--------|----|-----|-----|------|
| 1     | 6.022  | 108740493 | 39616917 | 98.578 |    |     |     |      |
| 2     | 20.726 | 11797     | 3143     | 0.011  |    |     |     |      |
| 3     | 26.084 | 5763      | 1452     | 0.005  |    |     |     |      |
| 4     | 28.133 | 5501      | 1359     | 0.005  |    |     |     |      |
| 5     | 28.738 | 1538628   | 349785   | 1.395  |    |     |     |      |
| 6     | 35.154 | 6440      | 1496     | 0.006  |    |     |     |      |
| 合計    |        | 110308622 | 39974152 |        |    |     |     |      |

**Fig S9:** Reduction of 4-Methoxybenzophenone using Ni–Al alloy and H<sub>2</sub>O at 60 °C for 3 h

### GC of Table 2 Entry 4

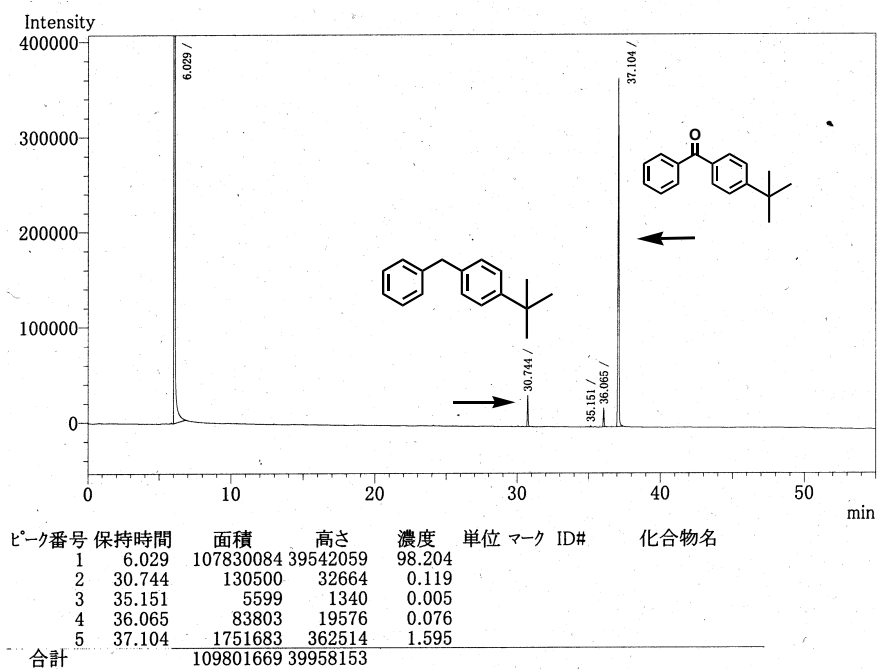

Fig S10: Reduction of 4-*tert*-butylbenzophenone using Ni–Al alloy and H<sub>2</sub>O at 60 °C for 3 h

### GC of Table 2 Entry 5

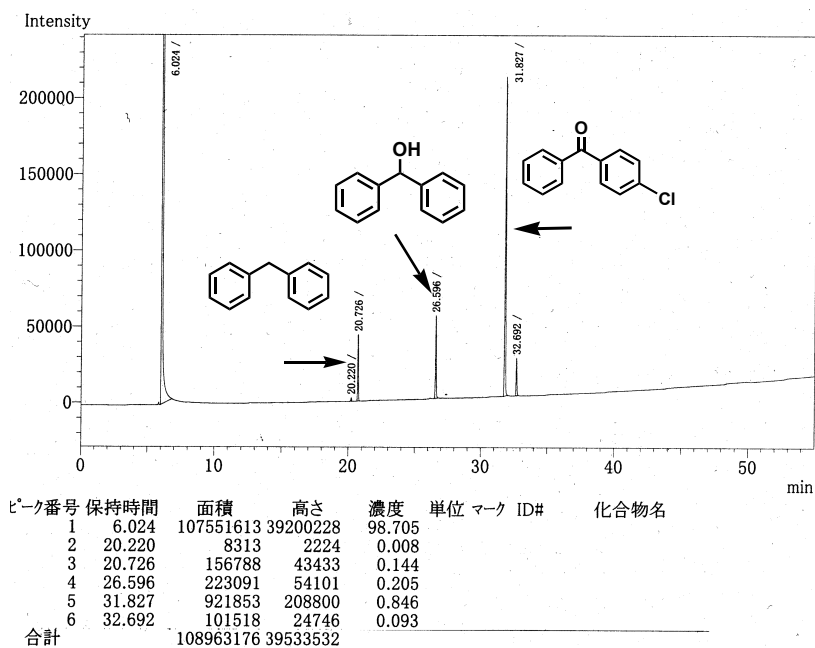

Fig S11: Reduction of 4-Chlorobenzophenone using Ni–Al alloy and H<sub>2</sub>O at 60 °C for 3 h



### GC of Table 7 Entry 1

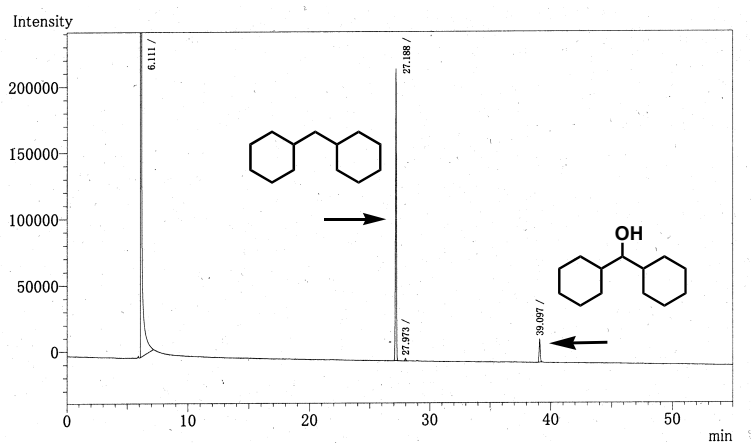

| ピーク番号 | 保持時間   | 面積        | 高さ       | 濃度     | 単位 | マーク ID# | 化合物名 |
|-------|--------|-----------|----------|--------|----|---------|------|
| 1     | 6.111  | 123543986 | 43163357 | 98.924 |    |         |      |
| 2     | 27.188 | 1221626   | 220124   | 0.978  |    |         |      |
| 3     | 27.973 | 10155     | 1889     | 0.008  |    |         |      |
| 4     | 39.097 | 111491    | 17529    | 0.089  |    |         |      |
| 合計    |        | 124887258 | 43402899 |        |    |         |      |

**Fig S12:** Reduction of Benzophenone using Ni–Al alloy, Al powder, Pt/C and H<sub>2</sub>O at 80 °C for 18 h

### GC of Table 7 Entry 2

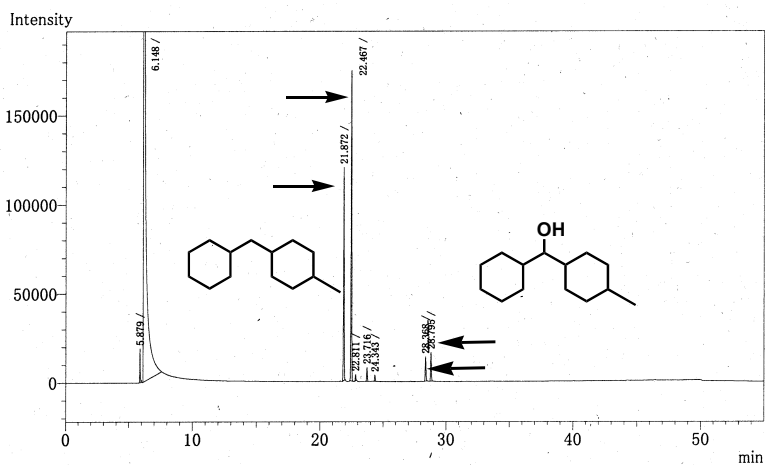

| ピーク番号 | 保持時間   | 面積        | 高さ       | 濃度     | 単位 | マーク ID# | 化合物名 |
|-------|--------|-----------|----------|--------|----|---------|------|
| 1     | 5.879  | 48065     | 18622    | 0.038  |    |         |      |
| 2     | 6.148  | 123594708 | 42928764 | 98.920 |    |         |      |
| 3     | 21.872 | 450943    | 118744   | 0.361  |    |         |      |
| 4     | 22.467 | 665102    | 173346   | 0.532  |    |         |      |
| 5     | 22.811 | 12641     | 3497     | 0.010  |    |         |      |
| 6     | 23.716 | 31786     | 7956     | 0.025  |    |         |      |
| 7     | 24.343 | 14407     | 3573     | 0.012  |    |         |      |
| 8     | 28.368 | 59031     | 13655    | 0.047  |    |         |      |
| 9     | 28.795 | 67794     | 16006    | 0.054  |    |         |      |
| 合計    |        | 124944477 | 43284163 |        |    |         |      |

**Fig S13:** Reduction of 4-Methylbenzophenone using Ni–Al alloy, Al powder, Pt/C and H<sub>2</sub>O at 80 °C for 18 h

### GC of Table 7 Entry 3

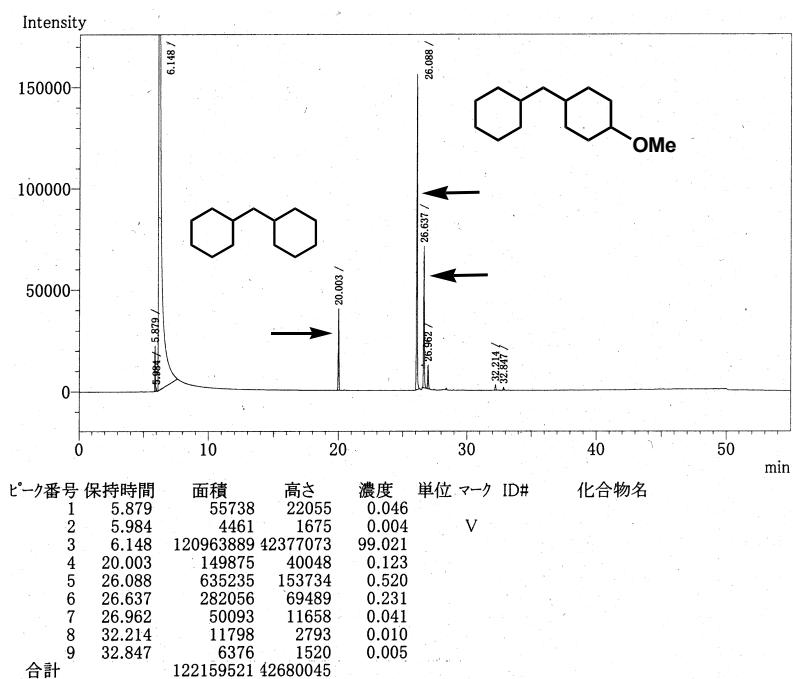

**Fig S14:** Reduction of 4-Methoxybenzophenone using Ni–Al alloy, Al powder, Pt/C and H<sub>2</sub>O at 80 °C for 18 h

### GC of Table 7 Entry 4

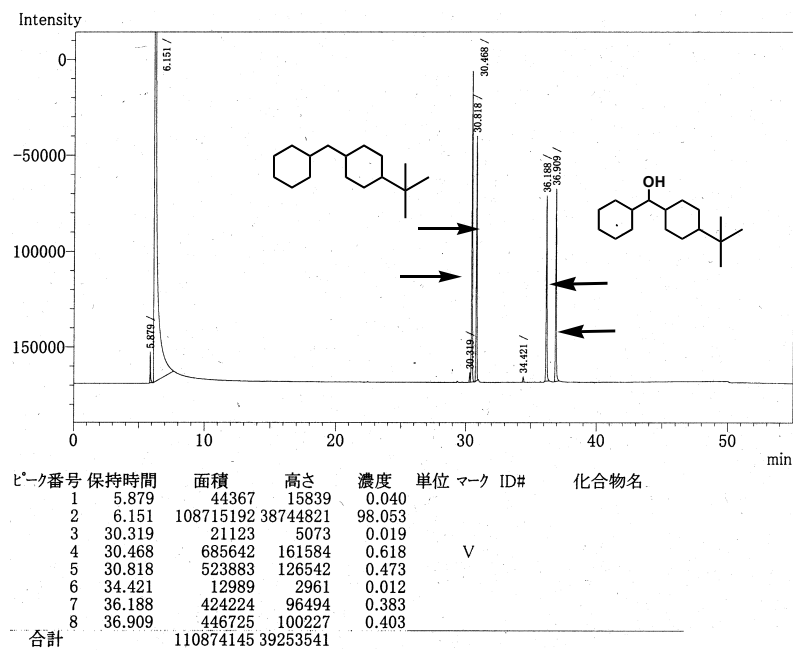

**Fig S15:** Reduction of 4-*tert*-butylbenzophenone using Ni–Al alloy, Al powder, Pt/C and H<sub>2</sub>O at 80 °C for 18 h

### GC of Table 7 Entry 5

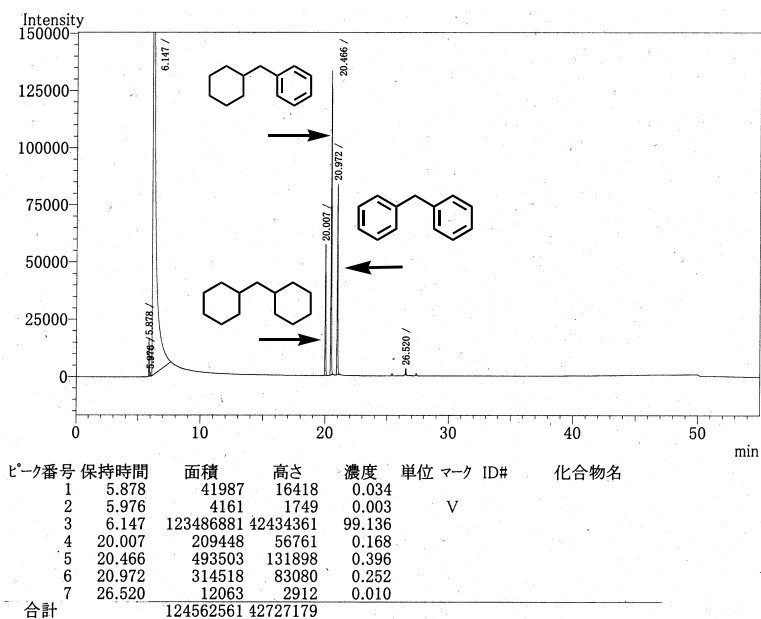

**Fig S16:** Reduction of 4-Chlorobenzophenone using Ni–Al alloy, Al powder, Pt/C and H<sub>2</sub>O at 80 °C for 18 h

### GC of Table 9 Entry 1

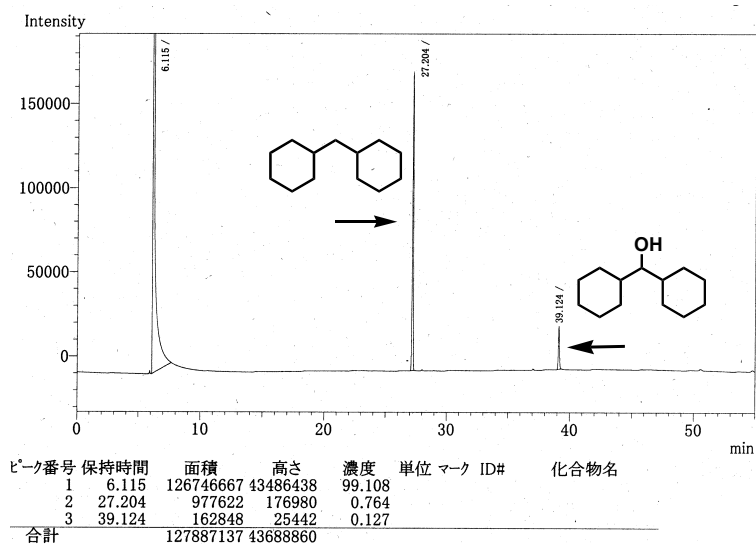

**Fig S17:** Reduction of Diphenylmethanol using Ni–Al alloy, Al powder, Pt/C and H<sub>2</sub>O at 80 °C for 18 h
